# Supplementary figures and images for: Host-induced bacterial cell wall decomposition mediates pattern-triggered immunity in Arabidopsis
Source: eLife journal article supplement (doi:10.7554/elife.01990), 2014-06-23

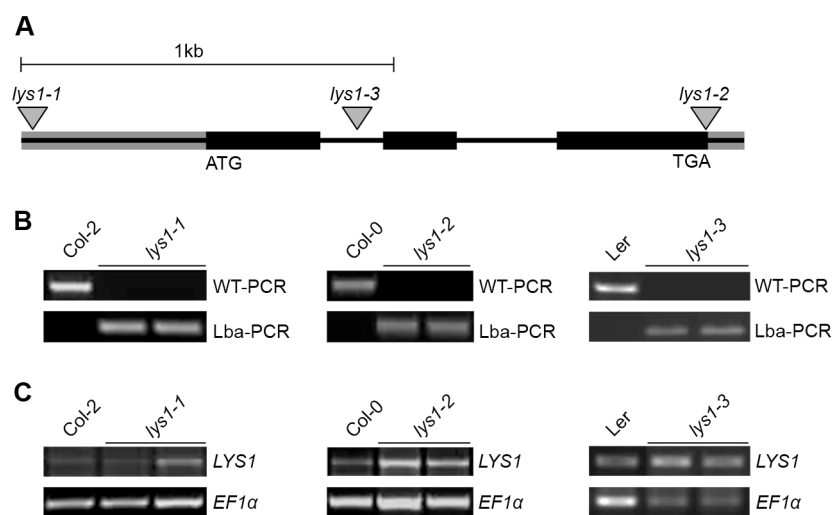

Supplement: supp [file elife-01990-supp-v1.zip]

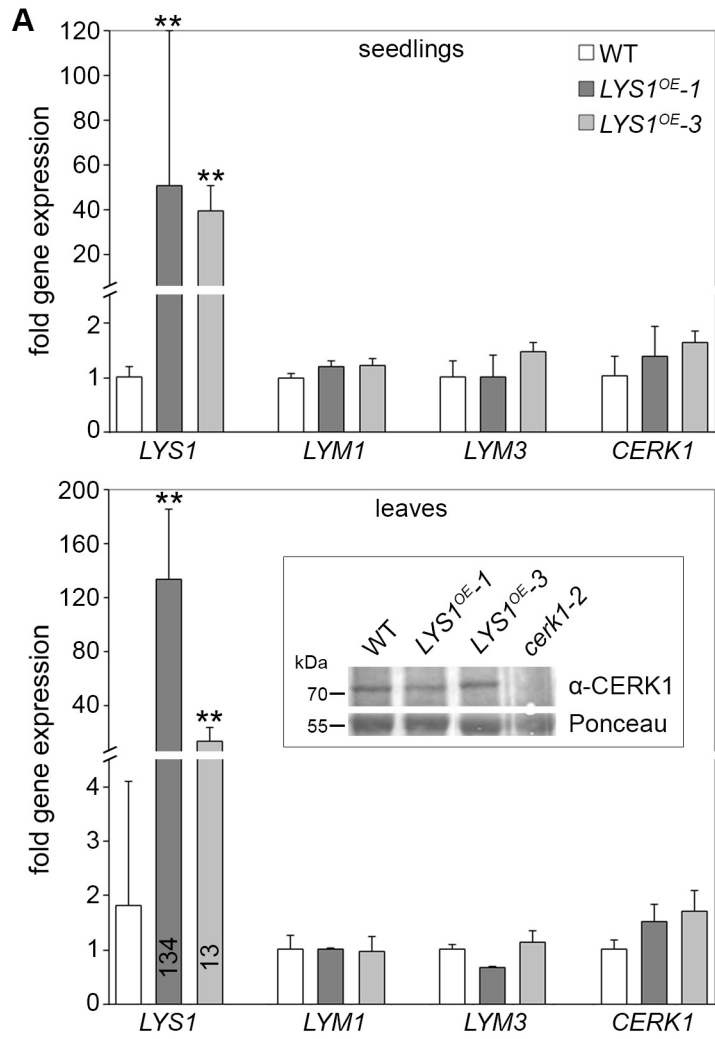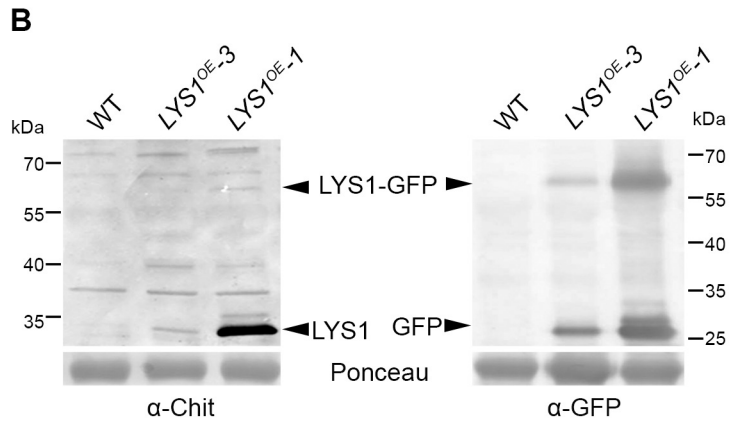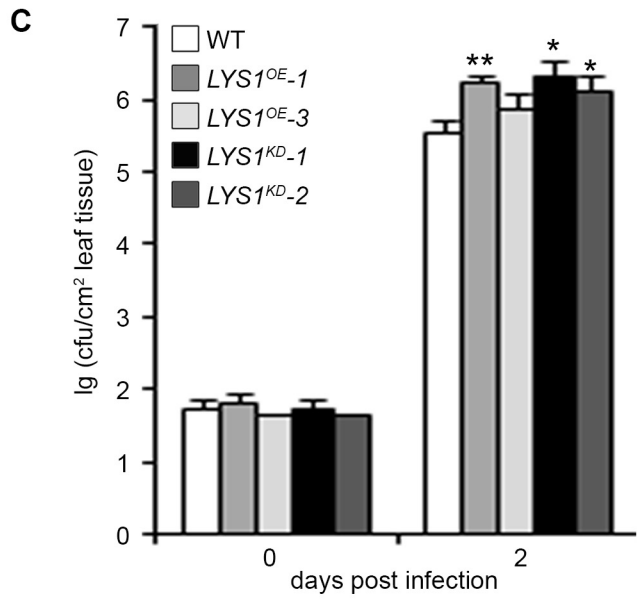

Supplement: supp [file elife-01990-supp-v1.zip]

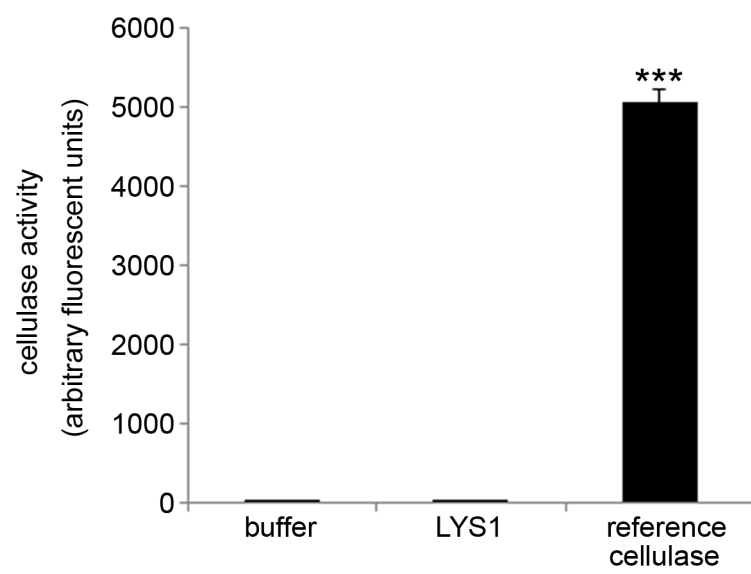

Supplement: supp [file elife-01990-supp-v1.zip]

**A**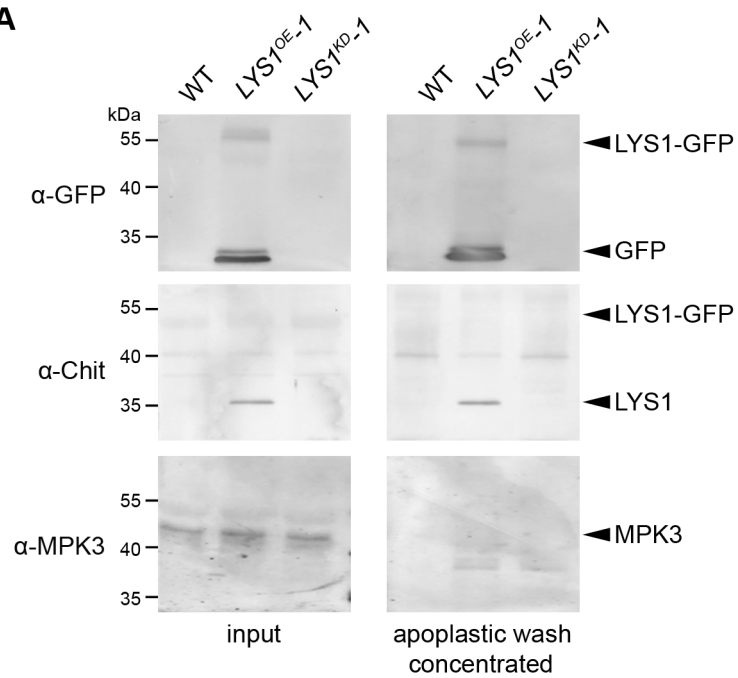**B**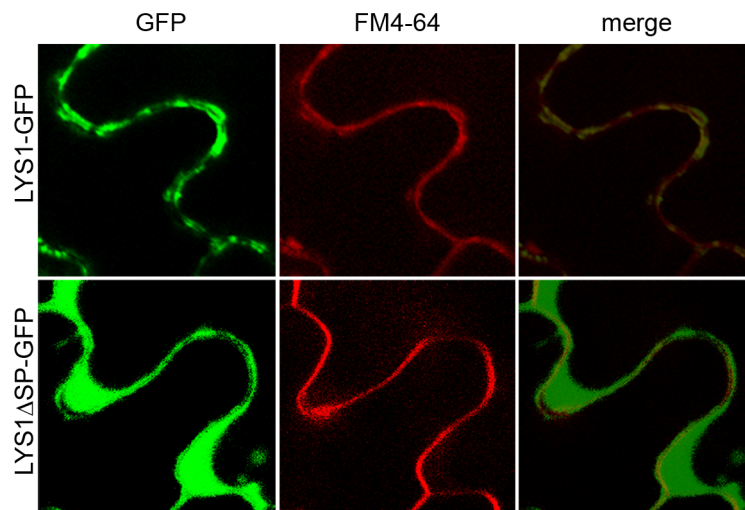

Supplement: supp [file elife-01990-supp-v1.zip]
